# Supplementary material for: Epidemiology of Drug Use and HIV-Related Risk Behaviors among People Who Inject Drugs in Mwanza, Tanzania
Source: PubMed Central journal article supplement (PMC4689416; doi:10.1371/journal.pone.0145578), 2015-12-23
Supplement: pone.0145578.s001.pdf [file pone.0145578.s001.pdf]

**Section 1: Socio-Demographic Information**

This first section is general information about yourself

|     | Questions and Filters                                                                                                  | Coding Categories                                                                                                                                                                                                                                                                |                                                | SKIP       |
|-----|------------------------------------------------------------------------------------------------------------------------|----------------------------------------------------------------------------------------------------------------------------------------------------------------------------------------------------------------------------------------------------------------------------------|------------------------------------------------|------------|
| 101 | Write interviewer's name<br><br>_____                                                                                  | Interviewer Initials<br><br>[ ][ ][ ]                                                                                                                                                                                                                                            |                                                |            |
| 102 | Write date of interview                                                                                                | [ ][ ] [ ][ ][ ] [ ][ ][ ][ ]<br>DAY MONTH YEAR                                                                                                                                                                                                                                  |                                                |            |
| 103 | Can you tell me your date of birth?<br><br><b>Write 99 in DAY, 999 in MONTH, 9999 in YEAR if DON'T KNOW</b>            | [ ][ ] [ ][ ][ ] [ ][ ][ ][ ]<br>DAY MONTH YEAR                                                                                                                                                                                                                                  |                                                |            |
| 104 | Gender                                                                                                                 | MALE<br><br>FEMALE                                                                                                                                                                                                                                                               | 1<br><br>2                                     |            |
| 105 | What is the highest level of education you have attained?                                                              | NEVER WENT TO SCHOOL<br>INCOMPLETE PRIMARY<br>COMPLETED PRIMARY (std 7)<br>SECONDARY (FORM ONE-FOUR)<br>SECONDARY (FORM FIVE-SIX)<br>INCOMPLETE POST SECONDARY<br>(UNIVERSITY OR COLLEGE)<br>COMPLETED POST-SECONDARY (UNIVERSITY OR COLLEGE)<br><br>DON'T KNOW/REFUSE TO ANSWER | 1<br>2<br>3<br>4<br>5<br>6<br>7<br>9           |            |
| 106 | What is your <u>current</u> marital status                                                                             | MARRIED OR LIVING AS MARRIED (ONLY 1 HUSBAND/WIFE)<br><br>MARRIED OR LIVING AS MARRIED (MORE THAN 1 HUSBAND/WIFE)<br><br>WIDOWED<br><br>SEPARATED/DIVORCED<br><br>SINGLE (NEVER MARRIED)<br><br>DON'T KNOW/REFUSE TO ANSWER                                                      | 1<br><br>2<br><br>3<br><br>4<br><br>5<br><br>9 |            |
| 107 | Do you currently live with your husband/wife or a sexual partner?                                                      | NO<br><br>YES                                                                                                                                                                                                                                                                    | 1<br><br>2                                     | <b>109</b> |
| 108 | How long have you been living with this husband/wife or sexual partner?<br><b>Write number of months and/or years.</b> | NUMBER OF MONTHS [ ][ ]<br><b>(Write 00 for MONTHS if less than 1 month)</b><br><br>NUMBER OF YEARS [ ][ ]<br><b>(Write 00 for YEARS less than 1 year)</b>                                                                                                                       |                                                |            |
| 109 | Living Arrangement                                                                                                     | OWN HOUSE<br>RENTED HOUSE<br>RENTING ROOM IN A GUESTHOUSE<br>FREE ROOM IN A GUESTHOUSE<br>RENTING ROOM ELSEWHERE                                                                                                                                                                 | 1<br>2<br>3<br>4<br>5                          |            |

|     |                                                                                                                                                                                                                       |                                                                                                       |                       |  |
|-----|-----------------------------------------------------------------------------------------------------------------------------------------------------------------------------------------------------------------------|-------------------------------------------------------------------------------------------------------|-----------------------|--|
|     |                                                                                                                                                                                                                       | FREE ROOM AT FRIENDS OR RELATIVE'S HOUSE<br>OTHER<br>SPECIFY: _____<br>DON'T KNOW/REFUSE TO ANSWER    | 6<br>7<br>9           |  |
| 110 | What is your main source of income?                                                                                                                                                                                   | JOB<br>SPOUSE/SEX PARTNER<br>FAMILY/FRIENDS<br>OTHER<br>SPECIFY: _____<br>DON'T KNOW/REFUSE TO ANSWER | 1<br>2<br>3<br>4<br>9 |  |
| 111 | <u>On average</u> , how much do you earn each month from your main source of income? ( <b>Probe so he/she gives you accurate answer. Request him/her to think about all earnings she gets from his/her main job</b> ) | Tshillings [__ __ __ __ __ __]<br>(Write 999999 if DON'T KNOW)                                        |                       |  |

**Section 2: Drug Use Risk Behaviors**

**Read:** This part of the survey is regarding drug use behaviors.. If you do not want to answer any of the questions, you do not have to.

|     | Questions and Filters                                                              | Coding Categories                                                                                                                                                                                     |                                      | SKIP |
|-----|------------------------------------------------------------------------------------|-------------------------------------------------------------------------------------------------------------------------------------------------------------------------------------------------------|--------------------------------------|------|
| 201 | What drugs have you <u>ever</u> used?<br>(Select all that apply)                   | Cannibinoids – resin – hashish<br>Cannibinoids – marijuana<br>Sniffing petrol/solvent<br>Opoids (heroin/cocaine)<br>Pharmaceuticals<br>Amphetamines<br>Other:<br>_____<br>DON'T KNOW/REFUSE TO ANSWER | 1<br>2<br>3<br>4<br>5<br>6<br>7<br>9 |      |
| 202 | What drugs have you used in the <u>past 12 months</u> ?<br>(Select all that apply) | Cannibinoids – resin – hashish<br>Cannibinoids – marijuana<br>Sniffing petrol/solvent<br>Opoids (heroin/cocaine)<br>Pharmaceuticals<br>Amphetamines<br>Other:<br>_____<br>DON'T KNOW/REFUSE TO ANSWER | 1<br>2<br>3<br>4<br>5<br>6<br>7<br>9 |      |

|     |                                                                                                                                                                             |                                                                                                                                                                                                       |                                      |     |
|-----|-----------------------------------------------------------------------------------------------------------------------------------------------------------------------------|-------------------------------------------------------------------------------------------------------------------------------------------------------------------------------------------------------|--------------------------------------|-----|
| 203 | What drugs are you <u>currently</u> using? ( <b>Select all that apply</b> )                                                                                                 | Cannibinoids – resin – hashish<br>Cannibinoids – marijuana<br>Sniffing petrol/solvent<br>Opoids (heroin/cocaine)<br>Pharmaceuticals<br>Amphetamines<br>Other:<br>_____<br>DON'T KNOW/REFUSE TO ANSWER | 1<br>2<br>3<br>4<br>5<br>6<br>7<br>9 |     |
| 204 | When was the last time you used any of the drugs you have mentioned?<br><br><b>Write 99 in DAY or 999 in MONTH if DON'T KNOW</b><br><b>Write 9999 in YEAR if DON'T KNOW</b> | [ ][ ] [ ][ ][ ][ ] [ ][ ][ ][ ][ ]<br>DAY MONTH YEAR                                                                                                                                                 |                                      |     |
| 205 | When did you start using drugs?<br><b>Write 99 in DAY or 999 in MONTH if DON'T KNOW</b><br><b>Write 9999 in YEAR if DON'T KNOW</b>                                          | [ ][ ] [ ][ ][ ][ ] [ ][ ][ ][ ][ ]<br>DAY MONTH YEAR                                                                                                                                                 |                                      |     |
| 206 | <u>On average</u> , how many days a week do you use drugs of any kind?                                                                                                      | NUMBER OF DAYS PER WEEK [ ][ ]<br>(Write 0 if NONE<br>9 if UNKNOWN)                                                                                                                                   |                                      |     |
| 207 | <u>On average</u> , how many times a day do you use drugs?                                                                                                                  | NUMBER OF TIMES A DAY [ ][ ][ ]<br>(Write 00 if NONE<br>Write 99 if UNKNOWN)                                                                                                                          |                                      |     |
| 208 | Have you <u>ever</u> injected any of the following drugs? ( <b>Select all that apply</b> )                                                                                  | Heroin<br>Cocaine<br>Methamphetamine<br>Other<br>_____<br>NONE<br>DON'T KNOW/REFUSE TO ANSWER                                                                                                         | 1<br>2<br>3<br>4<br>5<br>9           | 210 |
| 209 | Are you <u>currently</u> injecting any of the following drugs? ( <b>Select all that apply</b> )                                                                             | Heroin<br>Cocaine<br>Methamphetamine<br>Other<br>_____<br>NONE<br>DON'T KNOW/REFUSE TO ANSWER                                                                                                         | 1<br>2<br>3<br>4<br>5<br>9           |     |
| 210 | Are you <u>currently</u> using any of the following non-injection drugs? ( <b>Select all that apply</b> )                                                                   | Cannibinoids – resin – hashish<br>Cannibinoids – marijuana<br>Sniffing petrol/solvent<br>Opoids (heroin/cocaine)<br>Pharmaceuticals<br>Other:                                                         | 1<br>2<br>3<br>4<br>5<br>6           |     |

|     |                                                                                                                                                                                                          |  |                                                                                                                         |                                |            |
|-----|----------------------------------------------------------------------------------------------------------------------------------------------------------------------------------------------------------|--|-------------------------------------------------------------------------------------------------------------------------|--------------------------------|------------|
|     |                                                                                                                                                                                                          |  | NONE<br>DON'T KNOW/REFUSE TO ANSWER                                                                                     | 7<br>9                         |            |
| 211 | If you are a current injection drug user, have you ever shared needles/syringes with other users?                                                                                                        |  | NO<br>YES<br>DON'T KNOW/REFUSE TO ANSWER                                                                                | 1<br>2<br>9                    | 215<br>215 |
| 212 | Do you leave syringes in common locations where other drug users may have access to them?                                                                                                                |  | NO<br>YES<br>DON'T KNOW/REFUSE TO ANSWER                                                                                | 1<br>2<br>9                    |            |
| 213 | Do you know if another drug user has taken your syringe and used it?                                                                                                                                     |  | NO<br>YES<br>DON'T KNOW/REFUSE TO ANSWER                                                                                | 1<br>2<br>9                    |            |
| 214 | Did you share other injection equipment (like cookers) with other users at last injection?                                                                                                               |  | NO<br>YES<br>DON'T KNOW/REFUSE TO ANSWER                                                                                | 1<br>2<br>9                    |            |
| 215 | Did you clean injection equipment such as needles and cookers?                                                                                                                                           |  | NO<br>YES<br>DON'T KNOW/REFUSE TO ANSWER                                                                                | 1<br>2<br>9                    | 217<br>217 |
| 216 | Did you clean injection equipment such as needles and cookers?                                                                                                                                           |  | SOAP AND WATER<br>ALCOHOL<br>BLEACH<br>BOILING WATER<br>OTHER WAYS<br><br>SPECIFY: _____<br>DON'T KNOW/REFUSE TO ANSWER | 1<br>2<br>3<br>4<br>5<br><br>9 |            |
| 217 | Have you ever practiced "flashblood"?<br><i>(Explain what flashblood is: Flashblood is the practice in which you inject yourself with the blood of another drug user who has just recently injected)</i> |  | NO<br>YES<br>DON'T KNOW/REFUSE TO ANSWER                                                                                | 1<br>2<br>9                    | 219<br>219 |
| 218 | If YES, how many times do you practice flashblood a week?                                                                                                                                                |  | [ ] TIMES<br><i>(WRITE 999 FOR DON'T KNOW/REFUSE TO ANSWER)</i>                                                         |                                |            |
| 219 | Have you ever sold items for drugs?                                                                                                                                                                      |  | NO<br>YES<br>If YES, please specify what items:<br>_____<br>DON'T KNOW/REFUSE TO ANSWER                                 | 1<br>2<br>9                    |            |
| 220 | Have you ever traded sex for drugs?                                                                                                                                                                      |  | NO<br>YES<br>DON'T KNOW/REFUSE TO ANSWER                                                                                | 1<br>2<br>9                    |            |

|     |                                                                                                                                                                                |                                                                                                                                                                                                           |  |  |
|-----|--------------------------------------------------------------------------------------------------------------------------------------------------------------------------------|-----------------------------------------------------------------------------------------------------------------------------------------------------------------------------------------------------------|--|--|
| 221 | Have you ever gotten in trouble with the law while doing drugs?                                                                                                                | NO 1<br>YES 2<br>DON'T KNOW/REFUSE TO ANSWER 9                                                                                                                                                            |  |  |
| 222 | Where do you get your drugs?                                                                                                                                                   | DEALER 1<br>FRIENDS 2<br>FAMILY 3<br>PHARMACY 4<br>OTHER: 5<br>_____<br>DON'T KNOW/REFUSE TO ANSWER 9                                                                                                     |  |  |
| 223 | Is your husband/wife or sexual partner also a drug user?                                                                                                                       | NO 1<br>YES 2<br>DON'T KNOW/REFUSE TO ANSWER 9                                                                                                                                                            |  |  |
| 224 | What was the main reason you started doing drugs?                                                                                                                              | CURIOSITY 1<br>PEER PRESSURE 2<br>FOR FUN 3<br>FAMILY PROBLEMS 4<br>RELATIONSHIP PROBLEMS 5<br>INFLUENCE FROM FAMILY 6<br>IMPROVE SEXUAL PERFORMANCE 7<br>OTHER: _____ 8<br>DON'T KNOW/REFUSE TO ANSWER 9 |  |  |
| 225 | Can you mention health problems associated with using drugs? ( <b>Write the problems mentioned. If don't know or refuse to answer select 9</b> )                               | _____<br>_____<br>DON'T KNOW/REFUSE TO ANSWER 9                                                                                                                                                           |  |  |
| 226 | Can you mention health problems associated with sharing needles/syringes with other users? ( <b>Write the problems mentioned. If don't know or refuse to answer select 9</b> ) | _____<br>_____<br>DON'T KNOW/REFUSE TO ANSWER 9                                                                                                                                                           |  |  |

**Section 3: Sex Risk Behaviors**

|                                | Questions and Filters                                                                                                                                                                               | Coding Categories                                                                                                                                                                                                                                                                                                                                                                       |                                                                                                                                                                                                                                                                                                                                                                                                                                                                                               | SKIP                           |                     |                             |               |                         |                    |                         |               |                        |                |              |                             |                 |   |                             |   |  |  |
|--------------------------------|-----------------------------------------------------------------------------------------------------------------------------------------------------------------------------------------------------|-----------------------------------------------------------------------------------------------------------------------------------------------------------------------------------------------------------------------------------------------------------------------------------------------------------------------------------------------------------------------------------------|-----------------------------------------------------------------------------------------------------------------------------------------------------------------------------------------------------------------------------------------------------------------------------------------------------------------------------------------------------------------------------------------------------------------------------------------------------------------------------------------------|--------------------------------|---------------------|-----------------------------|---------------|-------------------------|--------------------|-------------------------|---------------|------------------------|----------------|--------------|-----------------------------|-----------------|---|-----------------------------|---|--|--|
| 301                            | How old were you at the first time you had sexual intercourse?                                                                                                                                      | AGE [__ __]<br>(Write 99 if DON'T KNOW)                                                                                                                                                                                                                                                                                                                                                 |                                                                                                                                                                                                                                                                                                                                                                                                                                                                                               |                                |                     |                             |               |                         |                    |                         |               |                        |                |              |                             |                 |   |                             |   |  |  |
| 302                            | The <u>last time</u> you had sex, did you use a condom? This could be either a male or female condom.                                                                                               | <table border="1"> <thead> <tr> <th></th> <th>NO</th> <th>YES</th> <th>DON'T KNOW</th> </tr> </thead> <tbody> <tr> <td>MALE CONDOM</td> <td>1</td> <td>2</td> <td>9</td> </tr> <tr> <td>FEMALE CONDOM</td> <td>1</td> <td>2</td> <td>9</td> </tr> </tbody> </table>                                                                                                                     |                                                                                                                                                                                                                                                                                                                                                                                                                                                                                               | NO                             | YES                 | DON'T KNOW                  | MALE CONDOM   | 1                       | 2                  | 9                       | FEMALE CONDOM | 1                      | 2              | 9            |                             |                 |   |                             |   |  |  |
|                                | NO                                                                                                                                                                                                  | YES                                                                                                                                                                                                                                                                                                                                                                                     | DON'T KNOW                                                                                                                                                                                                                                                                                                                                                                                                                                                                                    |                                |                     |                             |               |                         |                    |                         |               |                        |                |              |                             |                 |   |                             |   |  |  |
| MALE CONDOM                    | 1                                                                                                                                                                                                   | 2                                                                                                                                                                                                                                                                                                                                                                                       | 9                                                                                                                                                                                                                                                                                                                                                                                                                                                                                             |                                |                     |                             |               |                         |                    |                         |               |                        |                |              |                             |                 |   |                             |   |  |  |
| FEMALE CONDOM                  | 1                                                                                                                                                                                                   | 2                                                                                                                                                                                                                                                                                                                                                                                       | 9                                                                                                                                                                                                                                                                                                                                                                                                                                                                                             |                                |                     |                             |               |                         |                    |                         |               |                        |                |              |                             |                 |   |                             |   |  |  |
| 303                            | The <u>last time</u> you had sex, did you give/receive sex for drugs or money? ( <i>Here, "drugs" means illicit drugs</i> )                                                                         | <table border="1"> <thead> <tr> <th></th> <th>NO</th> <th>YES</th> <th>DON'T KNOW/REFUSE TO ANSWER</th> </tr> </thead> <tbody> <tr> <td></td> <td>1</td> <td>2</td> <td>9</td> </tr> </tbody> </table>                                                                                                                                                                                  |                                                                                                                                                                                                                                                                                                                                                                                                                                                                                               | NO                             | YES                 | DON'T KNOW/REFUSE TO ANSWER |               | 1                       | 2                  | 9                       |               |                        |                |              |                             |                 |   |                             |   |  |  |
|                                | NO                                                                                                                                                                                                  | YES                                                                                                                                                                                                                                                                                                                                                                                     | DON'T KNOW/REFUSE TO ANSWER                                                                                                                                                                                                                                                                                                                                                                                                                                                                   |                                |                     |                             |               |                         |                    |                         |               |                        |                |              |                             |                 |   |                             |   |  |  |
|                                | 1                                                                                                                                                                                                   | 2                                                                                                                                                                                                                                                                                                                                                                                       | 9                                                                                                                                                                                                                                                                                                                                                                                                                                                                                             |                                |                     |                             |               |                         |                    |                         |               |                        |                |              |                             |                 |   |                             |   |  |  |
| 304                            | Do you <u>regularly</u> use drugs while having sexual intercourse? ( <i>regularly = more than half the time</i> )                                                                                   | <table border="1"> <thead> <tr> <th></th> <th>NO</th> <th>YES</th> <th>DON'T KNOW/REFUSE TO ANSWER</th> </tr> </thead> <tbody> <tr> <td></td> <td>1</td> <td>2</td> <td>9</td> </tr> </tbody> </table>                                                                                                                                                                                  |                                                                                                                                                                                                                                                                                                                                                                                                                                                                                               | NO                             | YES                 | DON'T KNOW/REFUSE TO ANSWER |               | 1                       | 2                  | 9                       | 306           | 306                    |                |              |                             |                 |   |                             |   |  |  |
|                                | NO                                                                                                                                                                                                  | YES                                                                                                                                                                                                                                                                                                                                                                                     | DON'T KNOW/REFUSE TO ANSWER                                                                                                                                                                                                                                                                                                                                                                                                                                                                   |                                |                     |                             |               |                         |                    |                         |               |                        |                |              |                             |                 |   |                             |   |  |  |
|                                | 1                                                                                                                                                                                                   | 2                                                                                                                                                                                                                                                                                                                                                                                       | 9                                                                                                                                                                                                                                                                                                                                                                                                                                                                                             |                                |                     |                             |               |                         |                    |                         |               |                        |                |              |                             |                 |   |                             |   |  |  |
|                                | 305                                                                                                                                                                                                 | If <u>YES</u> , what kind of drugs do you use?                                                                                                                                                                                                                                                                                                                                          | <table border="1"> <tbody> <tr> <td>Cannibinoids – resin – hashish</td> <td>1</td> </tr> <tr> <td>Cannibinoids – marijuana</td> <td>2</td> </tr> <tr> <td>Sniffing petrol/solvent</td> <td>3</td> </tr> <tr> <td>Opoids (heroin/cocaine)</td> <td>4</td> </tr> <tr> <td>Opoids pharmaceuticals</td> <td>5</td> </tr> <tr> <td>Amphetamines</td> <td>6</td> </tr> <tr> <td>Other:<br/>_____</td> <td>7</td> </tr> <tr> <td>DON'T KNOW/REFUSE TO ANSWER</td> <td>9</td> </tr> </tbody> </table> | Cannibinoids – resin – hashish | 1                   | Cannibinoids – marijuana    | 2             | Sniffing petrol/solvent | 3                  | Opoids (heroin/cocaine) | 4             | Opoids pharmaceuticals | 5              | Amphetamines | 6                           | Other:<br>_____ | 7 | DON'T KNOW/REFUSE TO ANSWER | 9 |  |  |
| Cannibinoids – resin – hashish | 1                                                                                                                                                                                                   |                                                                                                                                                                                                                                                                                                                                                                                         |                                                                                                                                                                                                                                                                                                                                                                                                                                                                                               |                                |                     |                             |               |                         |                    |                         |               |                        |                |              |                             |                 |   |                             |   |  |  |
| Cannibinoids – marijuana       | 2                                                                                                                                                                                                   |                                                                                                                                                                                                                                                                                                                                                                                         |                                                                                                                                                                                                                                                                                                                                                                                                                                                                                               |                                |                     |                             |               |                         |                    |                         |               |                        |                |              |                             |                 |   |                             |   |  |  |
| Sniffing petrol/solvent        | 3                                                                                                                                                                                                   |                                                                                                                                                                                                                                                                                                                                                                                         |                                                                                                                                                                                                                                                                                                                                                                                                                                                                                               |                                |                     |                             |               |                         |                    |                         |               |                        |                |              |                             |                 |   |                             |   |  |  |
| Opoids (heroin/cocaine)        | 4                                                                                                                                                                                                   |                                                                                                                                                                                                                                                                                                                                                                                         |                                                                                                                                                                                                                                                                                                                                                                                                                                                                                               |                                |                     |                             |               |                         |                    |                         |               |                        |                |              |                             |                 |   |                             |   |  |  |
| Opoids pharmaceuticals         | 5                                                                                                                                                                                                   |                                                                                                                                                                                                                                                                                                                                                                                         |                                                                                                                                                                                                                                                                                                                                                                                                                                                                                               |                                |                     |                             |               |                         |                    |                         |               |                        |                |              |                             |                 |   |                             |   |  |  |
| Amphetamines                   | 6                                                                                                                                                                                                   |                                                                                                                                                                                                                                                                                                                                                                                         |                                                                                                                                                                                                                                                                                                                                                                                                                                                                                               |                                |                     |                             |               |                         |                    |                         |               |                        |                |              |                             |                 |   |                             |   |  |  |
| Other:<br>_____                | 7                                                                                                                                                                                                   |                                                                                                                                                                                                                                                                                                                                                                                         |                                                                                                                                                                                                                                                                                                                                                                                                                                                                                               |                                |                     |                             |               |                         |                    |                         |               |                        |                |              |                             |                 |   |                             |   |  |  |
| DON'T KNOW/REFUSE TO ANSWER    | 9                                                                                                                                                                                                   |                                                                                                                                                                                                                                                                                                                                                                                         |                                                                                                                                                                                                                                                                                                                                                                                                                                                                                               |                                |                     |                             |               |                         |                    |                         |               |                        |                |              |                             |                 |   |                             |   |  |  |
| 306                            | Thinking about the man/woman who you last had sex with, what is your relationship with this man/woman?<br><br><b>Record "OTHER REGULAR PARTNER" " if they have relationship for at least 1 year</b> | <table border="1"> <tbody> <tr> <td>HUSBAND/WIFE</td> <td>1</td> </tr> <tr> <td>CO-HABITING PARTNER</td> <td>2</td> </tr> <tr> <td>OTHER REGULAR</td> <td>3</td> </tr> <tr> <td>CASUAL AQUAINTANCE</td> <td>4</td> </tr> <tr> <td>OTHER</td> <td>5</td> </tr> <tr> <td>Specify: _____</td> <td></td> </tr> <tr> <td>DON'T KNOW/REFUSE TO ANSWER</td> <td>9</td> </tr> </tbody> </table> | HUSBAND/WIFE                                                                                                                                                                                                                                                                                                                                                                                                                                                                                  | 1                              | CO-HABITING PARTNER | 2                           | OTHER REGULAR | 3                       | CASUAL AQUAINTANCE | 4                       | OTHER         | 5                      | Specify: _____ |              | DON'T KNOW/REFUSE TO ANSWER | 9               |   |                             |   |  |  |
| HUSBAND/WIFE                   | 1                                                                                                                                                                                                   |                                                                                                                                                                                                                                                                                                                                                                                         |                                                                                                                                                                                                                                                                                                                                                                                                                                                                                               |                                |                     |                             |               |                         |                    |                         |               |                        |                |              |                             |                 |   |                             |   |  |  |
| CO-HABITING PARTNER            | 2                                                                                                                                                                                                   |                                                                                                                                                                                                                                                                                                                                                                                         |                                                                                                                                                                                                                                                                                                                                                                                                                                                                                               |                                |                     |                             |               |                         |                    |                         |               |                        |                |              |                             |                 |   |                             |   |  |  |
| OTHER REGULAR                  | 3                                                                                                                                                                                                   |                                                                                                                                                                                                                                                                                                                                                                                         |                                                                                                                                                                                                                                                                                                                                                                                                                                                                                               |                                |                     |                             |               |                         |                    |                         |               |                        |                |              |                             |                 |   |                             |   |  |  |
| CASUAL AQUAINTANCE             | 4                                                                                                                                                                                                   |                                                                                                                                                                                                                                                                                                                                                                                         |                                                                                                                                                                                                                                                                                                                                                                                                                                                                                               |                                |                     |                             |               |                         |                    |                         |               |                        |                |              |                             |                 |   |                             |   |  |  |
| OTHER                          | 5                                                                                                                                                                                                   |                                                                                                                                                                                                                                                                                                                                                                                         |                                                                                                                                                                                                                                                                                                                                                                                                                                                                                               |                                |                     |                             |               |                         |                    |                         |               |                        |                |              |                             |                 |   |                             |   |  |  |
| Specify: _____                 |                                                                                                                                                                                                     |                                                                                                                                                                                                                                                                                                                                                                                         |                                                                                                                                                                                                                                                                                                                                                                                                                                                                                               |                                |                     |                             |               |                         |                    |                         |               |                        |                |              |                             |                 |   |                             |   |  |  |
| DON'T KNOW/REFUSE TO ANSWER    | 9                                                                                                                                                                                                   |                                                                                                                                                                                                                                                                                                                                                                                         |                                                                                                                                                                                                                                                                                                                                                                                                                                                                                               |                                |                     |                             |               |                         |                    |                         |               |                        |                |              |                             |                 |   |                             |   |  |  |
| 307                            | In the <u>last 30 days</u> , how many different partners have you had sex with in total?                                                                                                            | NUMBER OF PARTNERS [__ __]<br>(Write 99 if DO NOT REMEMBER/DON'T KNOW/REFUSE TO ANSWER; write 00 if HAD NO SEX)                                                                                                                                                                                                                                                                         |                                                                                                                                                                                                                                                                                                                                                                                                                                                                                               |                                |                     |                             |               |                         |                    |                         |               |                        |                |              |                             |                 |   |                             |   |  |  |

|     |                                                                                       |                                                                                                                                             |                            |  |
|-----|---------------------------------------------------------------------------------------|---------------------------------------------------------------------------------------------------------------------------------------------|----------------------------|--|
| 308 | In the <u>last 30 days</u> , how often did you use condoms when having vaginal sex?   | Not had sex in the past 30 days<br>All the time<br>Most of the time<br>Some of the time<br>None of the time<br>DON'T KNOW/REFUSE TO ANSWER  | 1<br>2<br>3<br>4<br>5<br>9 |  |
| 309 | During the last 6 months, how many different partners have you had sex with in total? | NUMBER OF PARTNERS [ ___   ___   ___ ]<br>(Write 999 if <b>DO NOT REMEMBER</b><br>Write 000 for <b>NONE</b> or <b>HAD NO SEX</b> )          |                            |  |
| 310 | In the <u>last 6 months</u> , how often did you use condoms when having vaginal sex?  | Not had sex in the past 6 months<br>All the time<br>Most of the time<br>Some of the time<br>None of the time<br>DON'T KNOW/REFUSE TO ANSWER | 1<br>2<br>3<br>4<br>5<br>9 |  |
| 311 | In the <u>last 6 months</u> , how often did you use condoms when having anal sex?     | Not had sex in the past 6 months<br>All the time<br>Most of the time<br>Some of the time<br>None of the time<br>DON'T KNOW/REFUSE TO ANSWER | 1<br>2<br>3<br>4<br>5<br>9 |  |
| 312 | How would you describe your sexual orientation?                                       | STRAIGHT<br>HOMOSEXUAL<br>BISEXUAL<br>OTHER (PLEASE SPECIFY):<br>_____<br>DON'T KNOW/REFUSE TO ANSWER                                       | 1<br>2<br>3<br>4<br>9      |  |
| 313 | In the <u>last 30 days</u> , did you have anal sex?                                   | NO<br>YES<br>DON'T KNOW/REFUSE TO ANSWER                                                                                                    | 1<br>2<br>9                |  |
| 314 | In the <u>last 30 days</u> , how often did you use condoms when having anal sex?      | Not had sex in the past 30 days<br>All the time<br>Most of the time<br>Some of the time<br>None of the time<br>DON'T KNOW/REFUSE TO ANSWER  | 1<br>2<br>3<br>4<br>5<br>9 |  |

**Part 4: Alcohol Risk Behaviors**

**Read:** This part of the survey is regarding alcohol consumption. If you do not want to answer any questions, you do not have to.

|     | Question and filters                                                                                                                                       | Coding categories                                                                                                                                       | Skip |
|-----|------------------------------------------------------------------------------------------------------------------------------------------------------------|---------------------------------------------------------------------------------------------------------------------------------------------------------|------|
| 401 | Have you <u>ever</u> drunk an alcohol-containing beverage? For example beer, wine, local brew, or other alcoholic beverage?                                | NO 1<br>YES 2<br>DON'T KNOW/REFUSE TO ANSWER 9                                                                                                          | END  |
| 402 | In the past one year ( <u>12 months</u> ), have you drunk an alcohol-containing beverage? For example beer, wine, local brew, or other alcoholic beverage? | NO 1<br>YES 2<br>DON'T KNOW/REFUSE TO ANSWER 9                                                                                                          | END  |
| 403 | What alcohol-containing beverage do you <u>drink usually</u> ?                                                                                             | NO YES<br>BOTTLED BEER .....1 2<br>WINE .....1 2<br>SPIRIT/LIQUOR .....1 2<br>LOCAL BEER/ALCOHOLIC DRINK .....1 2<br>OTHER .....1 2<br>(Specify: _____) |      |
| 404 | How often do you have a drink containing alcohol?                                                                                                          | NEVER 1<br>MONTHLY OR LESS 2<br>2-4 TIMES A MONTH 3<br>2-3 TIMES A WEEK 4<br>4 OR MORE TIMES A WEEK 5<br>DON'T KNOW 9                                   |      |
| 405 | How often do you have six or more drinks on one occasion? ( <b>Probe</b> )                                                                                 | NEVER 1<br>LESS THAN MONTHLY 2<br>MONTHLY 3<br>WEEKLY 4<br>DAILY OR ALMOST DAILY 5<br>DON'T KNOW 9                                                      |      |
| 406 | How often during the last year have you found that you were not able to stop drinking once you had started? ( <b>Probe</b> )                               | NEVER 1<br>LESS THAN MONTHLY 2<br>MONTHLY 3<br>WEEKLY 4<br>DAILY OR ALMOST DAILY 5<br>DON'T KNOW 9                                                      |      |
